# Supplementary material for: EBV-miR-BHRF1-2 targets PRDM1/Blimp1: potential role in EBV lymphomagenesis
Source: PubMed Central journal article supplement — Leukemia. 2015 Dec 18;30(3):594–604. doi: 10.1038/leu.2015.285 (PMC4777778; doi:10.1038/leu.2015.285), 2015-12-18
Supplement: leu2015285x1.pdf [file leu2015285x1.pdf]

1 **Supplementary Methods**

2 **Antibodies**

3 Blimp-1/PRDM1 rabbit monoclonal antibody (C14A4) was purchased from Cell Signaling  
4 (Danvers, MA) and used at 1:1000 to detect the total *PRDM1* protein level in all cell lines by  
5 Western blotting. Blimp-1/PRDM1 mouse monoclonal antibody (3H2E8) for  
6 immunohistochemistry was purchased from Santa Cruz (Dallas, Texas) and used at 1:25  
7 dilution. Antibody against Lamin B was purchased from Santa Cruz Biotechnology Inc (Dallas,  
8 TX), and used at 1:500 dilutions. EBNA2 mouse monoclonal antibody (PE1) was purchased  
9 from DAKO North American, Inc (Carpinteria, CA) and used at 1:50 dilution. Fluorescence  
10 labeled goat anti-rabbit, goat anti-mouse and Donkey anti-goat from Li-Cor (Lincoln, NE) were  
11 used as secondary antibodies at 1:10000 dilutions.

12

13 **miRNA inhibitor and siRNA**

14 EBV-miR-BHRF1-2-3p miRNA inhibitor (mature EBV-miR-BHRF1-2-3p sequence:  
15 UAUCUUUUGCGGCAGAAUUGA) was purchased from Applied Biosystems, Grand Island,  
16 NY (Cat. No. 4464084-Assay ID: MH13071). Smartpool-On-TARGET plus PRDM1 siRNA was  
17 purchased from GE HEALTHCARE DHARMACON (Pittsburgh, PA, Cat No. L-009322-00-0005).  
18 ON-TARGET plus Non-targeting control Pool was purchased from GE HEALTHCARE  
19 DHARMACON (Cat No. D-001810-10-05). SiGLO Green Transfection Indicator was purchased  
20 from GE HEALTHCARE DHARMACON (Cat No. D-001630-01-20).

21

22 **Plasmid construction**

23 The PMSCV-PRDM1 expression plasmid was first generated by PCR amplification using  
24 PRDM1-f: 5'-AAGGTCGACATGTTGGATATTTGCTTGGAA-3' as forward primer, and PRDM-r:  
25 5'-GCCGAATTCTTAAGGATCCATTGGTTCA-3' as reverse primer, with PRDM1 $\alpha$  cDNA as the

26 template. The DNA fragment was then gel purified and double digested with XhoI and EcoRI  
27 prior to sub-cloning into the PSMCV-PIG vector (Addgene, Cambridge, MA). Construction of  
28 pSIC.PRDM1.3 UTR.538–2419 was as follows: A genomic fragment containing nucleotides  
29 1 to 2419 of the PRDM1 3 UTR was PCR-amplified using 5'-  
30 CTCGAGGATTTTCAGAAAACACTTATTTTGTTTC-3' as forward primer, and 5'-  
31 GCGGCCGCACATTTTGACAATTTGCACATAAATAAC-3' as reverse primer, the insert was  
32 gel purified and cloned into psiCHECK-2 (Promega, Madison, WI) down-stream of the  
33 Renilla luciferase coding region between the XhoI and NotI sites. The mutant reporter  
34 constructs were generated by using pSIC.PRDM1.3'UTR.538-2419 as a template and mutating  
35 the third and fourth positions of the seed region of EBV-miR-BHRF1-2 binding site using the  
36 GeneEditor *in vitro* Site-Directed Mutagenesis System (Promega). The sequence of EBV-miR-  
37 BHRF1-2 mut is: 5'-GTGAGCCAAGCCATGTAATTGATCTACTTTTTCTAAGGGC-3'. Sequence  
38 of both wild type and the mutant reporter constructs were confirmed by double-stranded  
39 sequencing. For construction of the pcDNA3.1-SCARNA20 plasmid, PCR amplification was first  
40 performed using CCL156 genomic DNA as template, and SCARNA20-100-F-NHEI: 5'-  
41 CTGGCTAGCGAGAACTATGAAGGAGCAGCTATTAC-3' as forward primer, SCARNA20+100-  
42 R-APAI: 5'-ACCGGGCCCTACAGCTTTGGGCAATTATAAACCT-3' as reverse primer. The  
43 DNA fragment was then gel purified and double digested with NHEI and APAI prior to sub-  
44 cloning into the pcDNA3.1 vector (Addgene, Cambridge, MA).

45

#### 46 **Western blotting and Immunohistochemistry**

47 Immunoblotting and Immunoperoxidase staining were performed according to previously  
48 described methods.<sup>9, 21</sup> Intensity of PRDM1 protein was measured by grayscale using Image J  
49 software, and normalized to Lamin B expression.

50

51 Immunohistochemistry double staining of Blimp1/EBNA2 was accomplished by staining the two  
52 antibodies sequentially, using Bond III Autostainer (Leica Microsystems). Sections were first  
53 baked and deparaffinized. They were then subjected to appropriate antigen retrieval and  
54 incubation procedures. For PRDM1, antigen retrieval was performed using Bond Epitope  
55 Retrieval Solution2 (ER2) at 99-100°C for 20 minutes (Leica Microsystems). Endogenous  
56 alkaline phosphatase was inactivated using Dako Dual Endogenous Block (Dako) for 5 minutes.  
57 Then sections were incubated with primary antibody, post primary AP, polymer AP (Bond  
58 Polymer Refine Red Detection, Leica Microsystems) and vector blue chromogen (Vector  
59 Laboratories, Inc.) for 15, 20, 30, and 20 minutes, respectively. For EBNA2, antigen retrieval  
60 was achieved by using Bond Epitope Retrieval Solution2 (ER2) at 99-100°C for 20 minutes  
61 (Leica Microsystems). Sections were then incubated sequentially with Dako Dual Endogenous  
62 Block (Dako) for 5 minutes, primary antibody for 15 minutes, post primary AP for 20minutes,  
63 polymer AP for 30 minutes and refine red for 15 minutes (Bond Polymer Refine Red Detection,  
64 Leica Microsystems). Finally slides were washed in H<sub>2</sub>O, then dehydrated in 100% Ethanol, and  
65 mounted using Leica CV5030 Glass Coverslipper.

66

### 67 **Gene expression assay probes**

68 *PRDM1* gene expression assay (Cat No. 4331182-Assay ID: Hs01068507\_m1) that detects the  
69 total PRDM1 mRNA level was purchased from Applied Biosystems (Grand Island, NY). Gene  
70 expression assays for qPCR validation including: *KRTAP5-6*, *PTGER3*, *SLFNL1*, *SNORD92*,  
71 *SNORD71*, *BCYRN1*, *BTCC1*, *LOC100505978*, *SCARNA11*, *MIR4659A*, *SNOARD80*, *GPN1*,  
72 *SCARNA20*, and *GAPDH* gene were also purchased from Applied Biosystems.

73

### 74 **MicroRNA Quantitation**

75 EBV-miR-BHRF1-2 expression levels in a panel of LCLs and FFPE samples were determined  
76 using EBV-miR-BHRF1-2 TaqMan® MicroRNA Assay (Cat No. 4427975-Assay ID: 197239\_mat)  
77 (Applied Biosystems, Grand Island, NY) according to manufacturer's instructions. The  
78 expression levels of EBV-miR-BHRF1-2 were normalized to endogenous control UN48 and the  
79 relative levels were calculated using the  $\Delta\Delta C_t$  method.

80

### 81 **Firefly luciferase assay**

82 To assess the effect of EBV-miR-BHRF1-2 binding site on luciferase activity, 20 nM of EBV-  
83 miR-BHRF1-2 precursor molecule (Ambion, Austin, TX) was co-transfected with either 20 nM of  
84 pSIC.PRDM1.3'UTR 538 to 2419 wild type or mutant plasmids in 293T cells, respectively.  
85 Firefly luciferase assay was performed as previously described.<sup>9</sup>

86

### 87 **Cell cycle analysis and apoptosis assay**

88 For the miRNA/siRNA study,  $0.5 \times 10^6$  CCL159 and CCL156 cells were transfected either with  
89  $1 \mu\text{g}$  pMSCV-PIG vector or pMSCV-PRDM1 plasmids, or co-transfected with one of the four  
90 combinations: miRNA inhibitor negative control plus siRNA scramble control; EBV-miR-BHRF1-  
91 2 inhibitor plus scramble control; miRNA inhibitor negative control plus *PRDM1* siRNA; EBV-  
92 miR-BHRF1-2 inhibitor plus PRDM1 siRNA. For the SCARNA20 study,  $0.5 \times 10^6$  LCL cells were  
93 co-transfected with one of the four combinations: pcDNA3.1 plus pMSCV-PIG; pcDNA3.1-  
94 SCARNA20 plus pMSCV-PIG; pMSCV-PRDM1 plus pcDNA3.1; pcDNA3.1-SCARNA20 plus  
95 pMSCV-PRDM1 at 48 h time point. Cells were labeled with bromodeoxyuridine (BD Biosciences,  
96 San Jose, CA) for 2 h prior to stain with V450 conjugated anti-BrdU antibody (BD Biosciences)  
97 according to manufacturer's instruction. The percentage of cell cycle distribution was measured  
98 by flowJo (Tree Star Inc. Ashland, OR). Cell viability was determined at 48 h time point by PE  
99 annexin V Apoptosis Detection Kit I (BD Biosciences) using LSRII flow cytometer.

100

101 **Whole transcriptome sequencing (RNA-seq)**

102 1.5 x10<sup>7</sup> of JY25 and CCL159 cells were transfected with 30 µg of one of the following: PRDM1-  
103 PIG, PMSCV-PRDM1 plasmid, 2 µM EBV-miR-BHRF1-2 inhibitor or miRNA inhibitor negative  
104 control. Total RNA was extracted from cells at 48 h time point using Qiagen RNasey mini kit  
105 (Valencia, CA) upon transfection, and transfection efficiency was determined by flow cytometry.  
106 The *PRDM1* mRNA expression was also quantified using qPCR assay prior to the RNA seq  
107 analyses. The integrity of RNA samples were checked on the 2100 Electrophoresis Bioanalyzer  
108 instrument (Agilent Technologies, Santa Clara, CA) with RNA integrity number of greater than 9.  
109 In addition, RNA concentrations were measured on Qubit (life technologies, Grand Island, NY).  
110 500 ng of total RNA was reverse transcribed into single stranded cDNA using Truseq RNA  
111 sample preparation kit v2 (illumina, San Diego, CA), DNA library was then validated using the  
112 2100 Electrophoresis Bioanalyzer instrument, and sequence was performed on HiSeq  
113 2500/1500 with 4 pooled libraries per lane.

114

115 **Total and miRNA extraction from formalin-fixed paraffin-embedded (FFPE) samples**

116 Total RNA, including the small RNA fraction was extracted from eight FFPE samples using  
117 miRNeasy kit according to the instruction manual (Qiagen, Valencia, CA). EBV-miR-BHRF1-2  
118 and *PRDM1* mRNA expression were determined by qPCR using cDNA reverse transcribed from  
119 either 10 ng or 80 ng of RNA inputs as described previously.<sup>6</sup>
