# Supplementary material for: EBV-miR-BHRF1-2 targets PRDM1/Blimp1: potential role in EBV lymphomagenesis
Source: PubMed Central journal article supplement — Leukemia. 2015 Dec 18;30(3):594–604. doi: 10.1038/leu.2015.285 (PMC4777778; doi:10.1038/leu.2015.285), 2015-12-18
Supplement: leu2015285x3.pdf [file leu2015285x3.pdf]

1 **Supplementary Fig. 1. Representative transfection efficiencies in CCL159 cells**

2 0.5 x10<sup>6</sup> CCL159 cells were transfected with either 1 μg of *PRDM1* plasmid or 1 μM of FITC-  
3 conjugated siRNA scramble control prior to flow cytometry analysis. Transfections were tested  
4 using various programs. The most optimal program was selected and its associated transfection  
5 efficiency was illustrated in scatterplots. (A) At program #16, 51% GFP positive cells (blue gated  
6 population) were obtained in CCL159 cells upon transfection of *PRDM1* plasmid at 48 h post  
7 transfection in comparison to mock-transfected cells. (B) At program #15, 84.5% of FITC  
8 positive cells (blue gated population) were observed in CCL159 cells transfected with SiGLO  
9 RNAi control at 48 h post transfection compared to mock transfected cells.
