# Supplementary figures and images for: EBV-miR-BHRF1-2 targets PRDM1/Blimp1: potential role in EBV lymphomagenesis
Source: PubMed Central journal article supplement — Leukemia. 2015 Dec 18;30(3):594–604. doi: 10.1038/leu.2015.285 (PMC4777778; doi:10.1038/leu.2015.285), 2015-12-18

Supply. Fig. 1

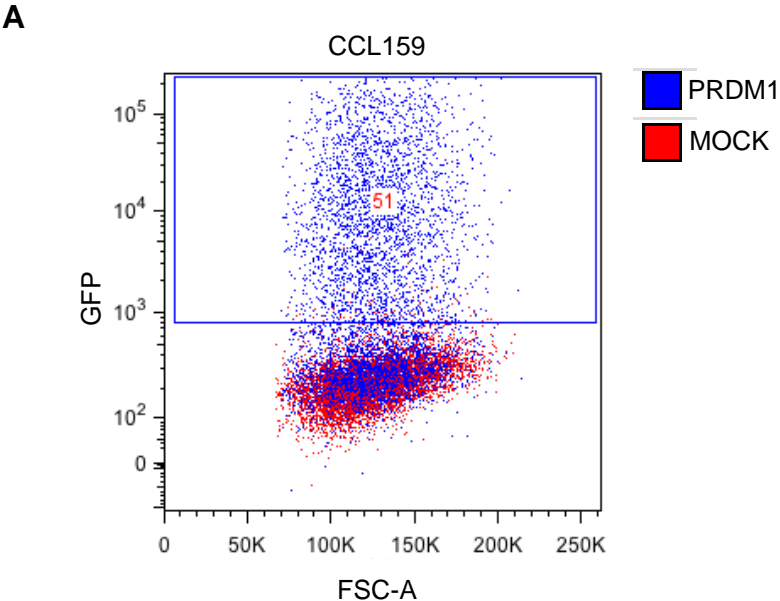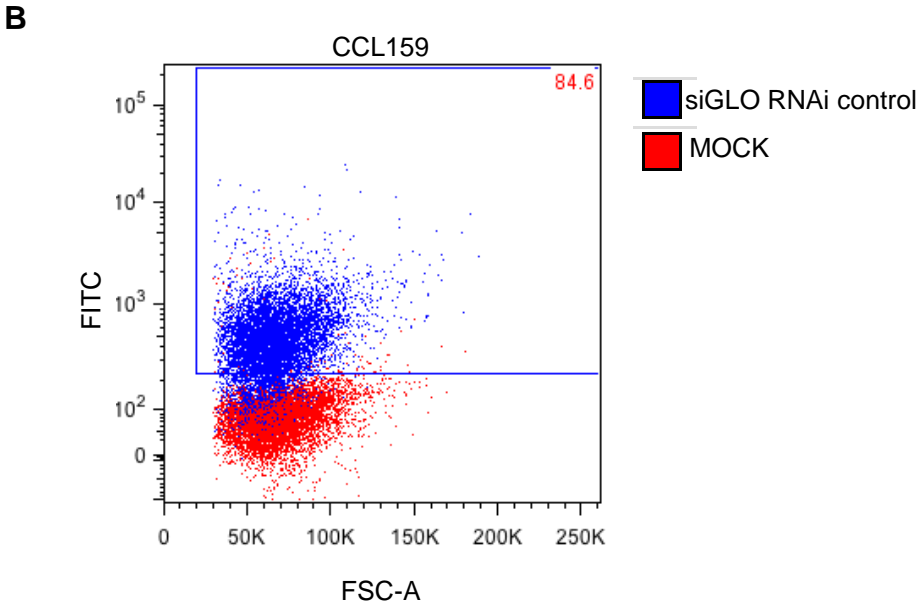

Supplement: leu2015285x2.pdf [file leu2015285x2.pdf]
